# Supplementary material for: Chiral ionic liquid assisted synthesis of some metal oxides
Source: Royal Society of Chemistry journal article supplement (doi:10.1039/c6ra25736d), 2017-01-01

## SEM images of the samples synthesized with CIL

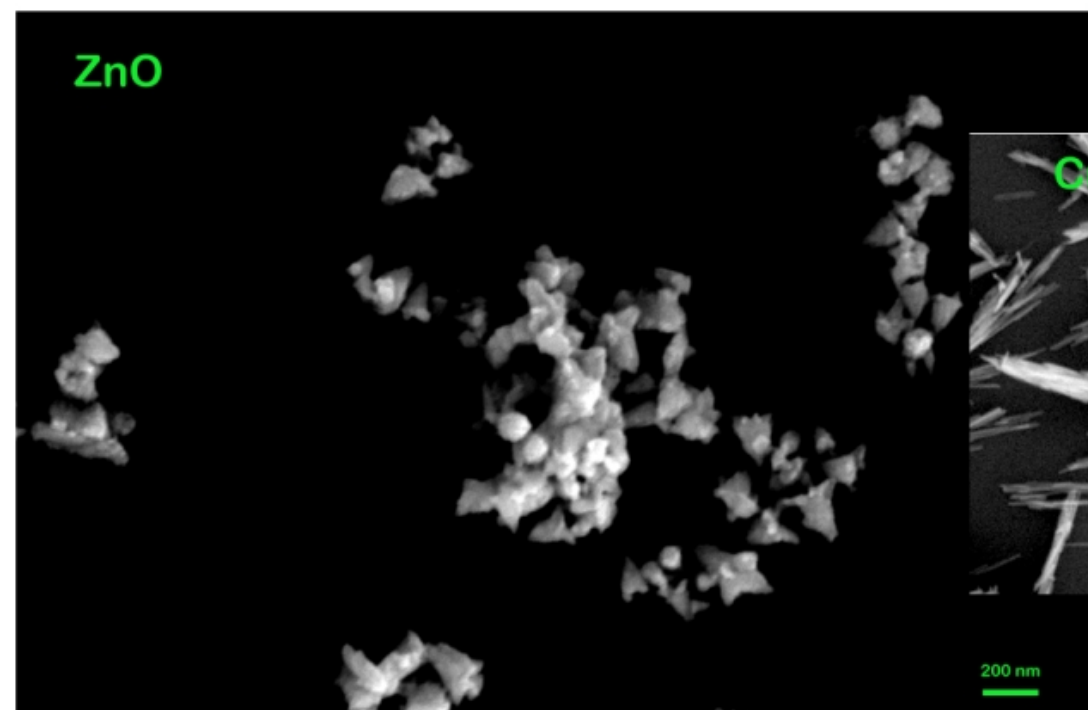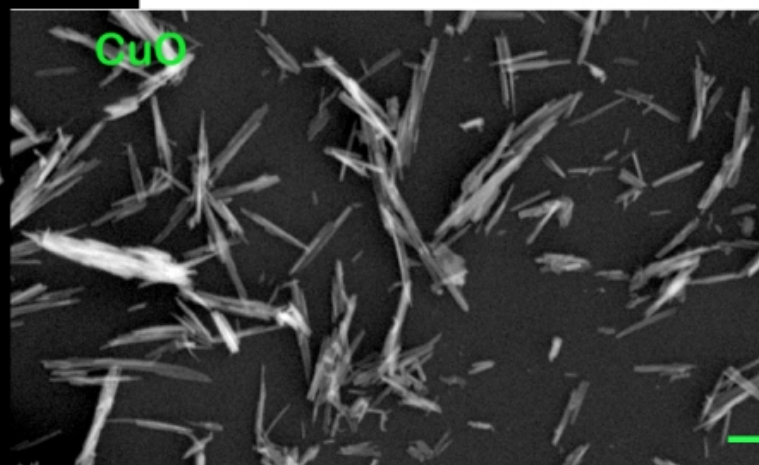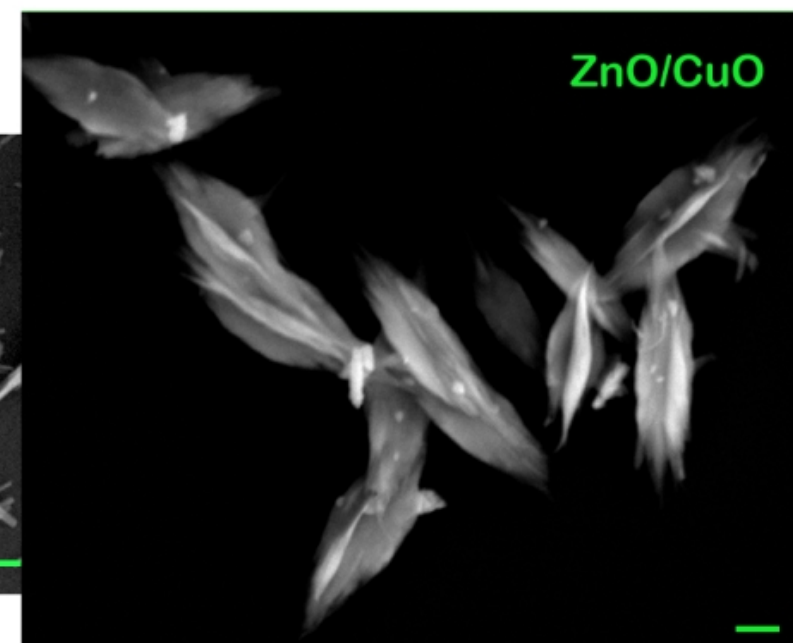

# XRD pattern for ZnO

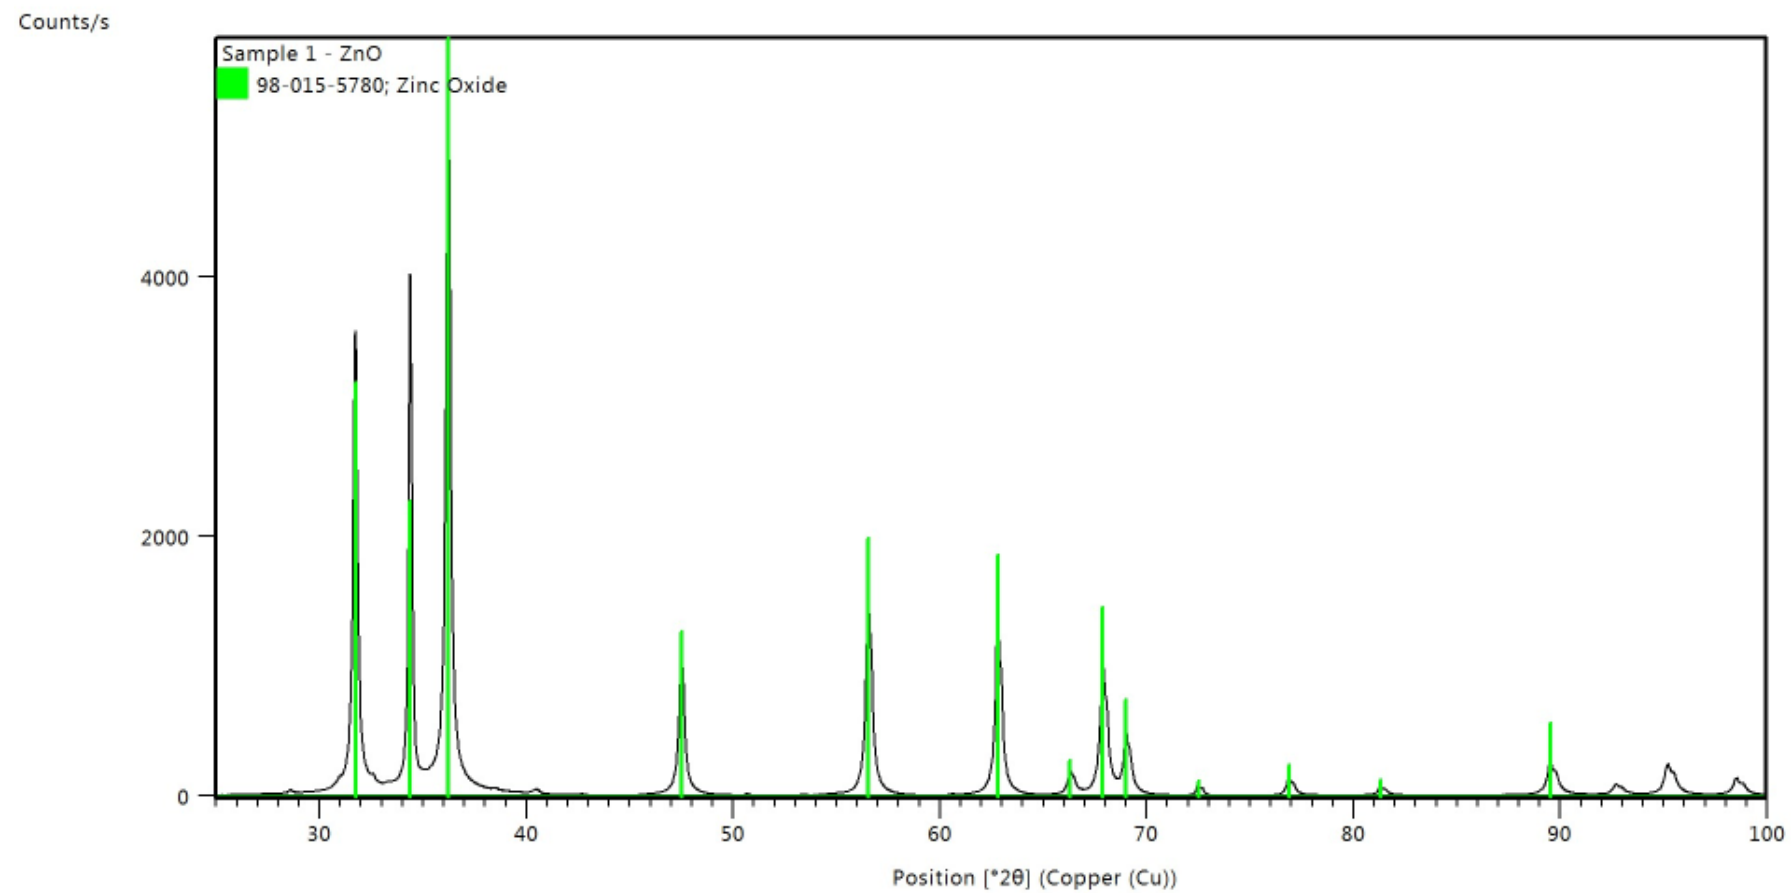

## XRD pattern for CuO

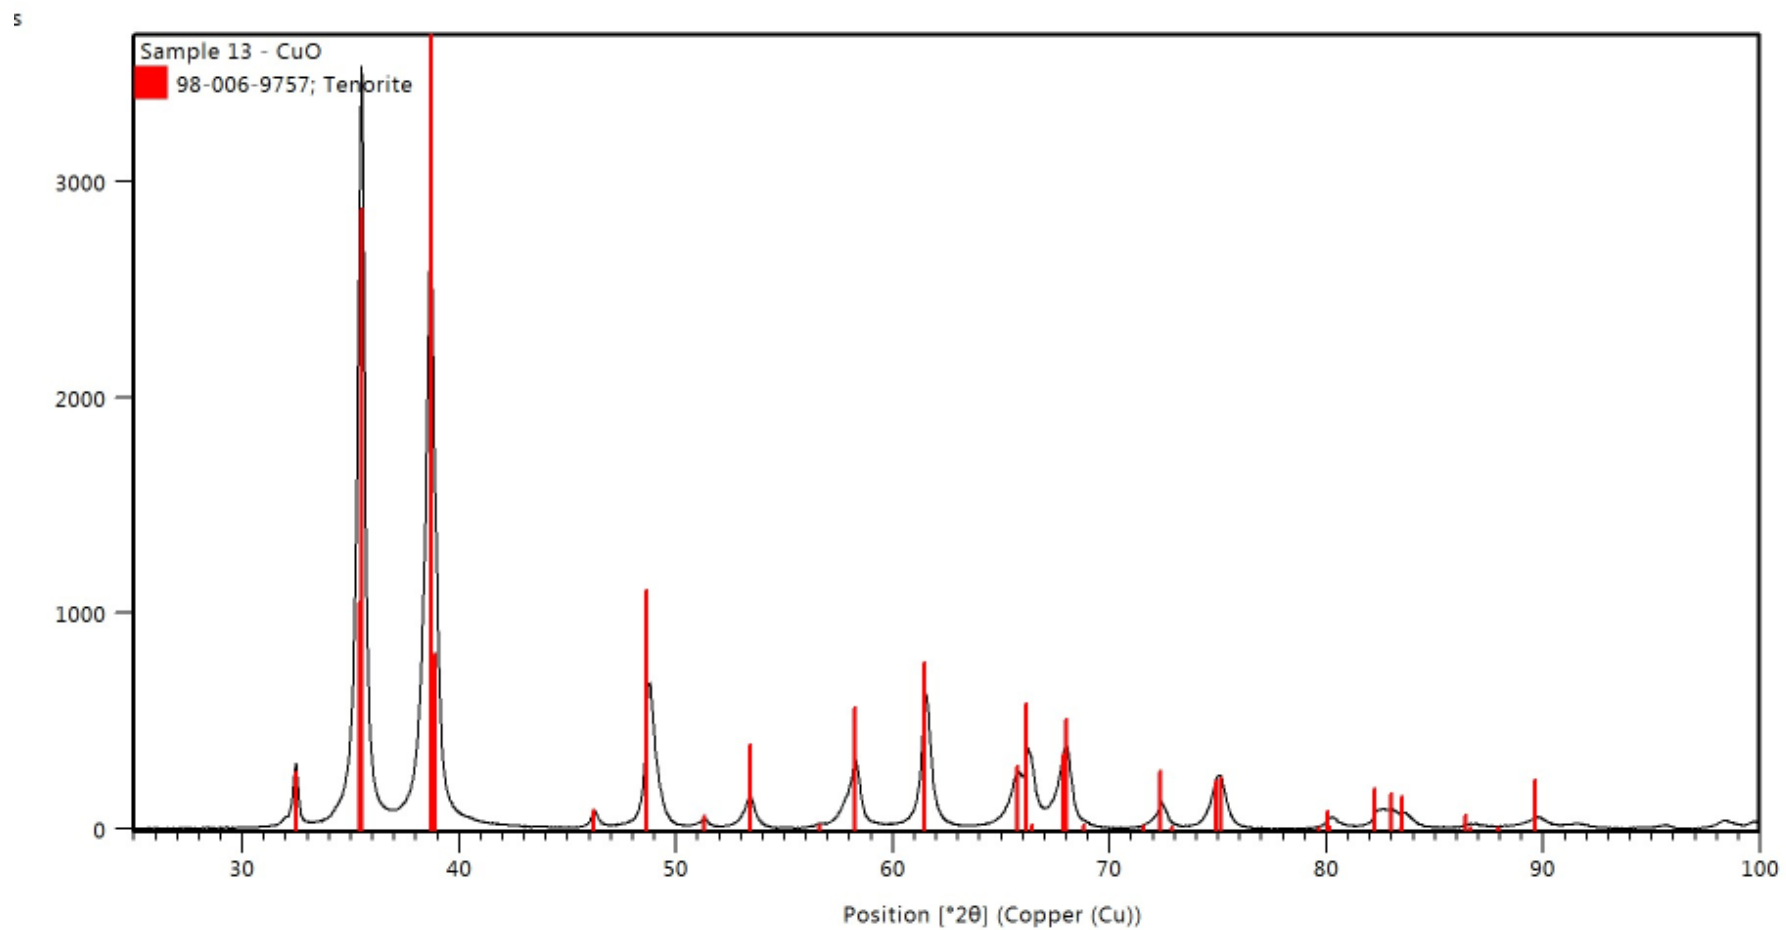

## XRD pattern of ZnO-CuO

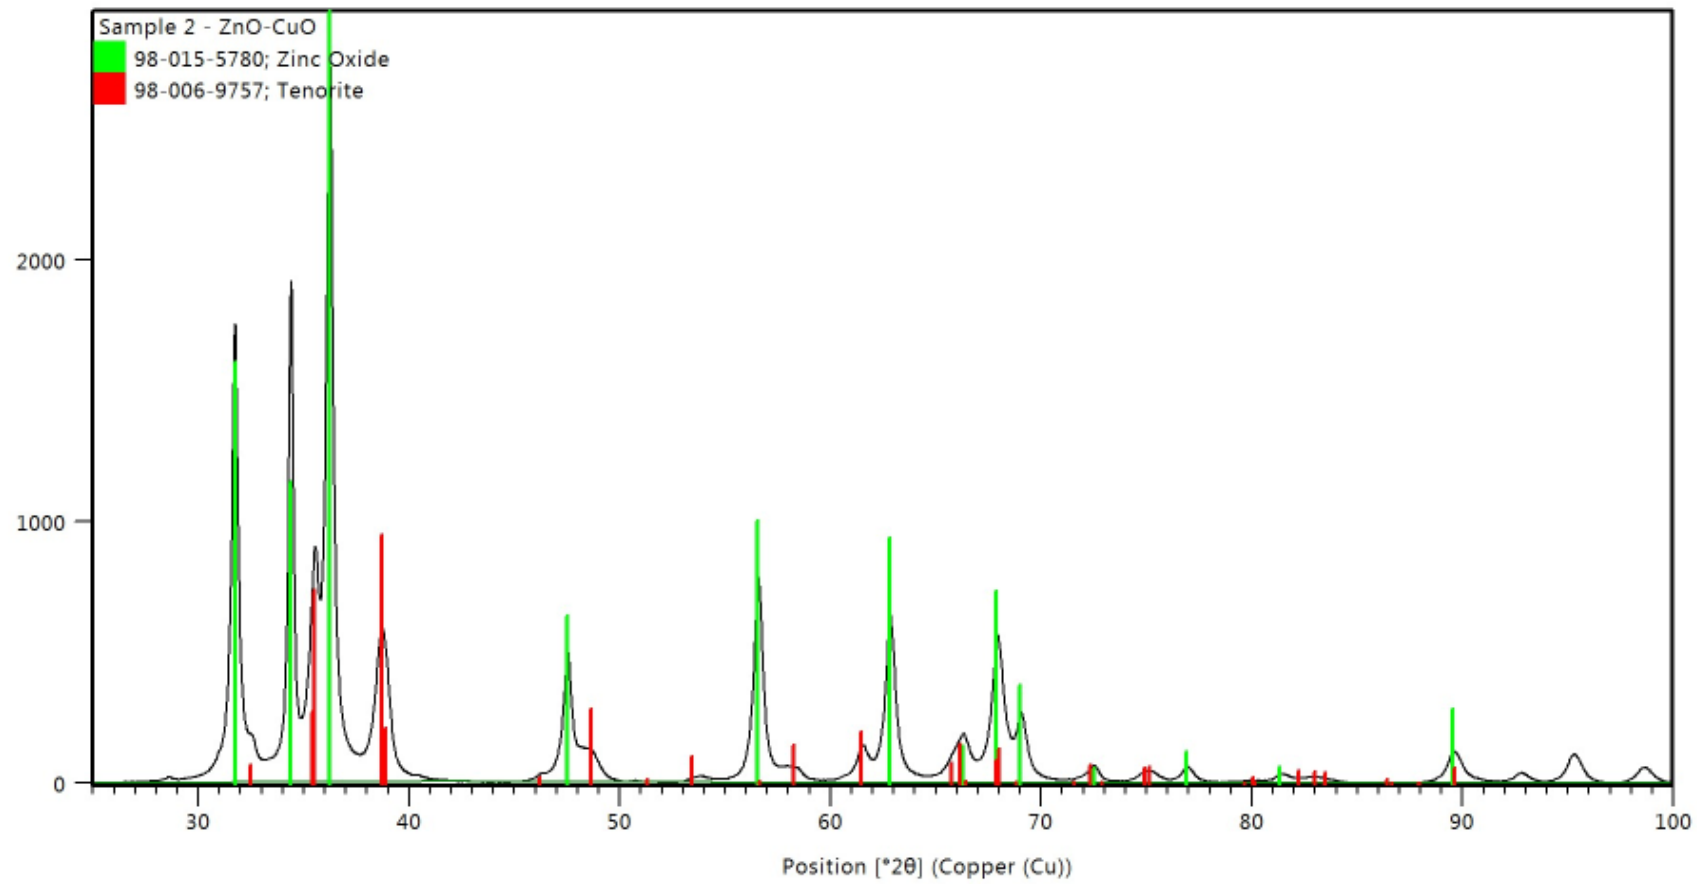

Supplement: c6ra25736d1.pdf [file c6ra25736d1.pdf]
